# Supplementary material
Source: Research Square preprint supplement (doi:10.21203/rs.3.rs-9844874/v1)
Supplement: Supplementary file 1 [file c82d9e427d4013919bf6f66d.docx]

| Name |  | | Sex | | |  | | ASA physical status classification | | |  |
| --- | --- | --- | --- | --- | --- | --- | --- | --- | --- | --- | --- |
| Age |  | | Height(cm)/  Weight(kg) | | |  | | BMI（kg/m2） | | |  |
|  | | HR(beats/min) | | SBP(mmHg) | | | DBP(mmHg) | | | MAP(mmHg) | |
| Before anesthesiainduction（T0 ） | |  | |  | | |  | | |  | |
| 1 min after anesthesia induction(T1 ) | |  | |  | | |  | | |  | |
| Immediately after puncture(T2 ) | |  | |  | | |  | | |  | |
| Immediately at the end of surgery（T3） | |  | |  | | |  | | |  | |
| Time of eye-opening recovery （T4） | |  | |  | | |  | | |  | |
| 10 min after recovery(T5) | |  | |  | | |  | | |  | |
| Adverse reactions | | Hypotension □ | | | Hypertension □ | | | | Bradycardia □ | | |
| Body movement □ | | | Coughing □ | | | | Hypoxemia □ | | |
| Additional dosage of ciprofol (mg) | |  | | | | | | | | | |
| Operation duration（min） | |  | | | | | | | | | |
| Recovery time（min） | |  | | | | | | | | | |
| 1 h postoperatively | | VAS score | | | | |  | | | | |
| Nausea □ | | | | | Vomiting □ | | | | |
