# Supplementary material
Source: Research Square preprint supplement (doi:10.21203/rs.3.rs-9844874/v1)
Supplement: Supplementary file 2 [file e1e369e799392881d6b9de3c.docx]

**Figure 1: CONSORT 2025 Flow Diagram**

Flow diagram of the progress through the phases of a randomised trial of two groups (that is, enrolment, intervention allocation, follow-up, and data analysis)

Allocated to intervention (15 parallel dosage groups, n=20 per group, intergroup comparison; detailed data in Table 1 )

Received allocated intervention (Subgroup compliance data shown in Table 1 )

Did not receive allocated intervention (give reasons) (Unused, see subgroup Table 1 )

Analysis

Analysed for primary outcome (n=300 )

Excluded from analysis (give reasons) (n=1 )

Discontinued intervention (give reasons) (n=0 )

Lost to follow-up for primary outcome (give reasons) (n=0 ):

Dropout data of each dosage group are summarized in Table 1

Excluded (n= 6)

Not meeting inclusion criteria(n=5 )

Declined to participate (n=0 )

Other reasons (n=1 )

Randomised (n=301 )

Allocation

Follow-Up

Allocated to intervention (n=301 )

Received allocated intervention (n=300 )

Did not receive allocated intervention (give reasons) (n=1)

Enrolment

Assessed for eligibility (n=306 )

Analyzed cases of individual groups listed in Table 1
